# Supplementary figures and images for: Streptococcal sagA activates a proinflammatory response in mast cells by a sublytic mechanism
Source: PubMed Central journal article supplement — Cell Microbiol. 2019 Jul 7;21(9):e13064. doi: 10.1111/cmi.13064 (PMC6771685; doi:10.1111/cmi.13064), 2019-07-07

**A**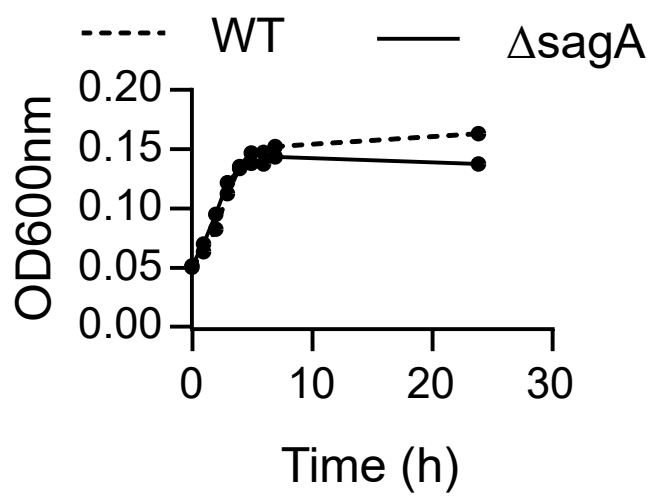**B**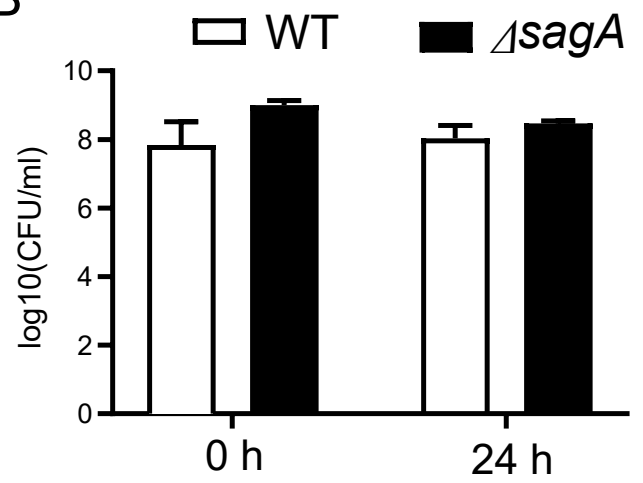**C**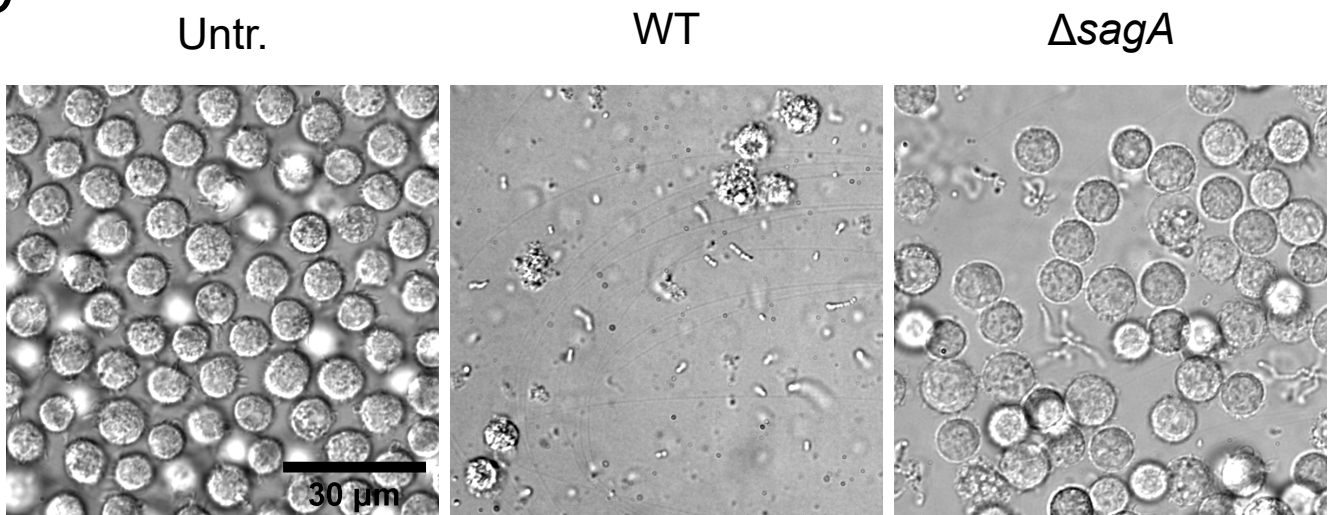

Supplement: CMI-21-na-s006.pdf [file CMI-21-na-s006.pdf]

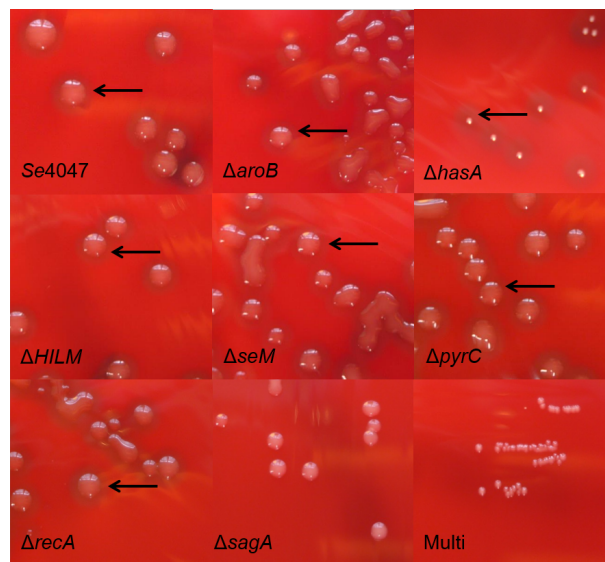

Supplement: CMI-21-na-s007.pdf [file CMI-21-na-s007.pdf]

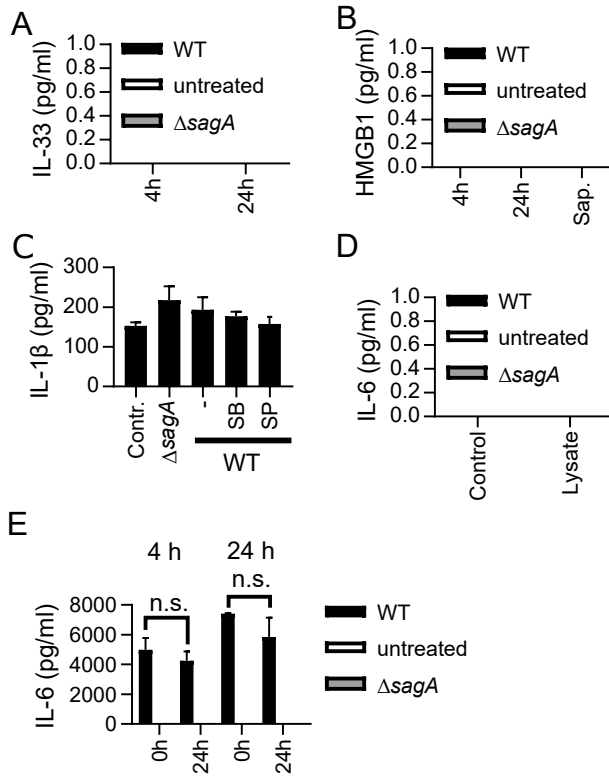

Supplement: CMI-21-na-s008.pdf [file CMI-21-na-s008.pdf]

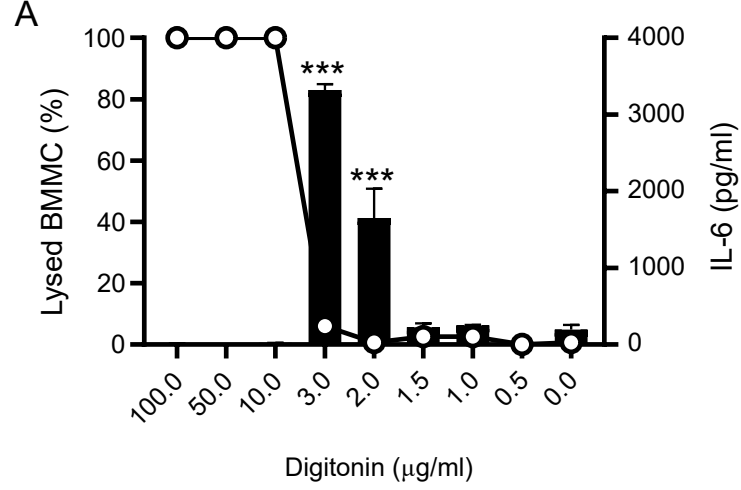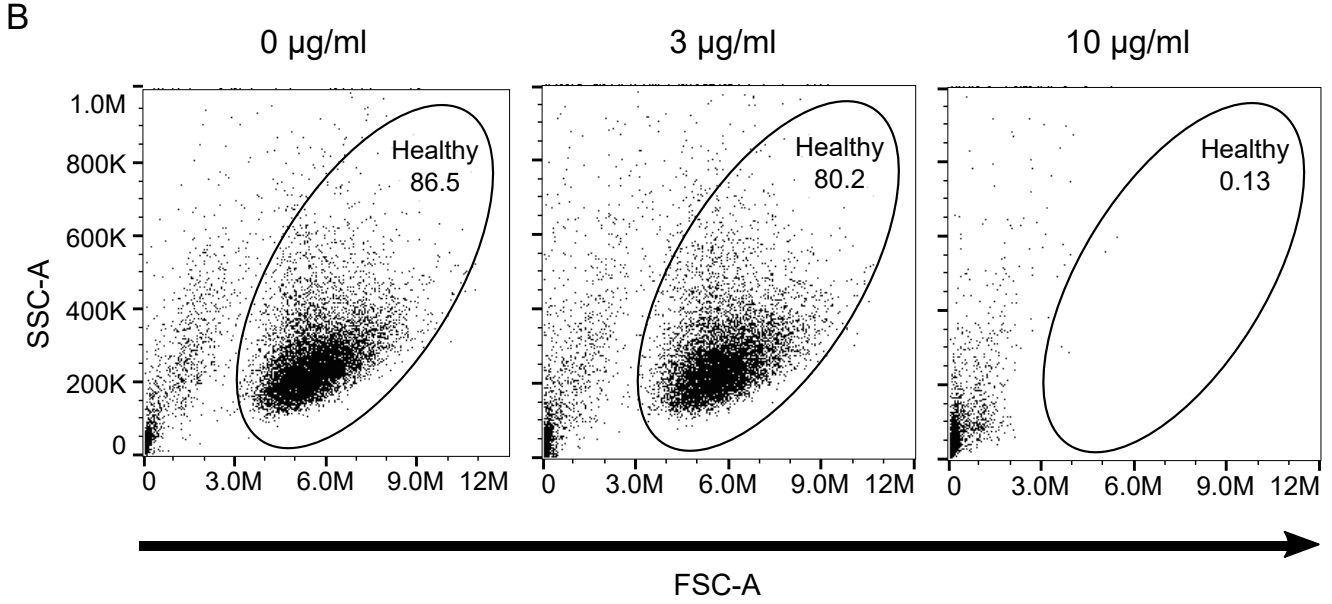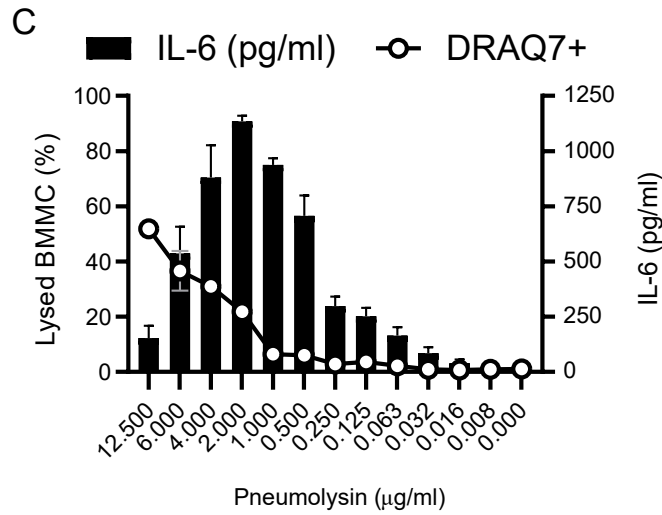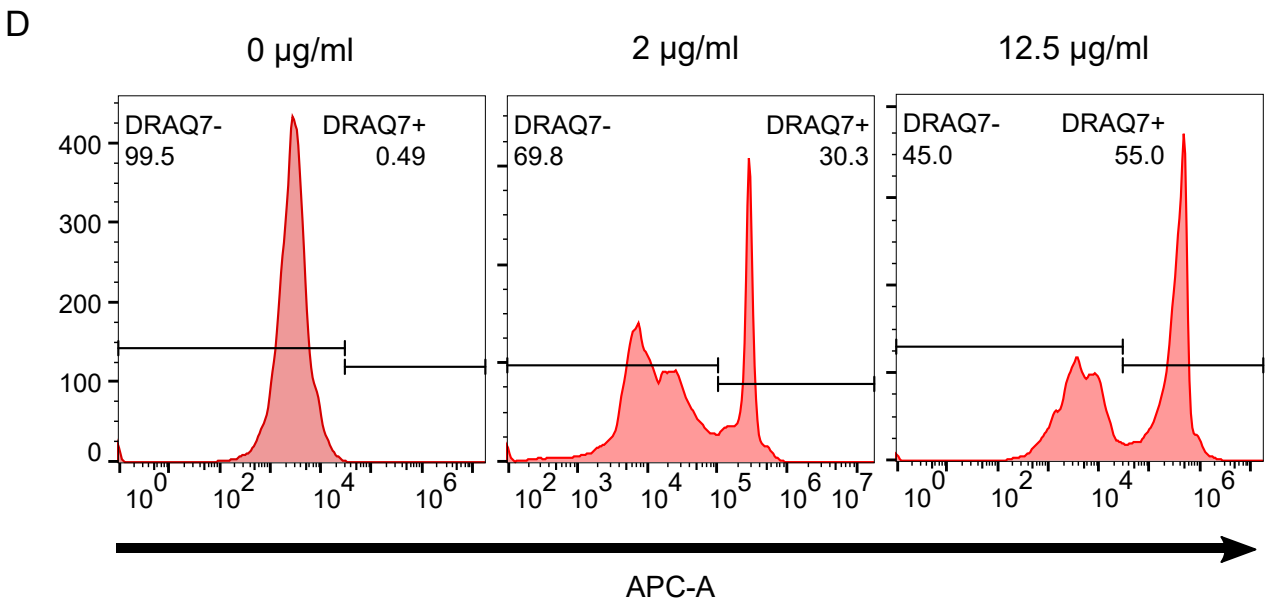

Supplement: CMI-21-na-s009.pdf [file CMI-21-na-s009.pdf]
